# Supplementary material for: Comparative efficacy and safety of COVID-19 vaccines in phase III trials: a network meta-analysis
Source: Springer Nature journal article supplement (doi:10.1186/s12879-023-08754-3), 2024-02-21
Supplement: MOESM2 [file 26760156]

## Supplementary Appendix

|                                                                                                                                             |    |
|---------------------------------------------------------------------------------------------------------------------------------------------|----|
| <b>Table S1.</b> Search strategy.....                                                                                                       | 3  |
| <b>Table S2.</b> Raw data of included studies.....                                                                                          | 4  |
| <b>Table S3.</b> Definition, time horizon, and follow-up time of efficacy outcome.....                                                      | 6  |
| <b>Figure S1.</b> Comparison of demographic information of included studies.....                                                            | 8  |
| <b>Figure S2.</b> Overall risk of bias assessment using Version 2 of the Cochrane tool for assessing risk of bias in randomized trials..... | 9  |
| <b>Table S4.</b> Comprehensive comparisons for type-specific efficacy.....                                                                  | 10 |
| <b>Table S5.</b> SUCRA value of various types of vaccines in the network meta-analysis of type-specific efficacy.....                       | 10 |
| <b>Figure S3.</b> Network diagram of type-specific safety.....                                                                              | 10 |
| <b>Table S6.</b> SUCRA value of various types of vaccines in the network meta-analysis of type-specific safety.....                         | 11 |
| <b>Table S7.</b> Comprehensive comparisons for type-specific safety.....                                                                    | 11 |
| <b>Figure S4.</b> Funnel plot and Egger's test of vaccine efficacy and safety.....                                                          | 11 |
| <b>Table S8.</b> Comprehensive comparisons for efficacy of individual vaccines in adults.....                                               | 12 |
| <b>Table S9.</b> SUCRA value of various vaccines in the network meta-analysis of vaccine efficacy in adults.....                            | 13 |
| <b>Figure S5.</b> Network diagram of individual vaccine safety in adults.....                                                               | 13 |
| <b>Table S10.</b> Comprehensive comparisons for safety of individual vaccines in adults.....                                                | 14 |
| <b>Table S11.</b> SUCRA value of various vaccines in the network meta-analysis of vaccine safety in adults.....                             | 15 |
| <b>Figure S6.</b> Network diagram of type-specific efficacy in the elderly.....                                                             | 15 |
| <b>Table S12.</b> Comprehensive comparisons for type-specific efficacy in the elderly.....                                                  | 16 |
| <b>Table S13.</b> SUCRA value of various types of vaccines in the network meta-analysis of type-specific efficacy in the elderly.....       | 16 |

**Figure S7.** Funnel plot and Egger's test of vaccine efficacy in the elderly.....16

**Figure S8.** Network diagram of individual vaccine efficacy in the elderly.....17

**Table S14.** SUCRA value of various vaccines in the network meta-analysis of vaccine efficacy in the elderly.....17

**Table S15.** Comprehensive comparisons for efficacy of individual vaccines in the elderly.....18

**Table S16.** Results of network meta-analysis after excluding trials with a follow-up time of less than 2 months...19

**Table S1.** Search strategy

| <b>PubMed</b> |                                                                                                                                                                                                                                            |
|---------------|--------------------------------------------------------------------------------------------------------------------------------------------------------------------------------------------------------------------------------------------|
| #1            | (COVID-19[MeSH Terms]) OR (2019 novel coronavirus disease[Title/Abstract]) OR (2019-nCoV[Title/Abstract]) OR (SARS-CoV-2[Title/Abstract])                                                                                                  |
| #2            | (vaccine[MeSH Terms])                                                                                                                                                                                                                      |
| #3            | (efficacy[Title/Abstract]) OR (safety[Title/Abstract]) OR (side effects[Title/Abstract])                                                                                                                                                   |
| #4            | (randomized controlled trial[MeSH Terms]) OR (controlled clinical trial[Title/Abstract]) OR (randomized[Title/Abstract]) OR (placebo[Title/Abstract]) OR (randomly[Title/Abstract]) OR (trial[Title/Abstract]) OR (groups[Title/Abstract]) |
| #5            | #1 AND #2 AND #3 AND #4                                                                                                                                                                                                                    |

**Table S2.** Raw data of included studies

| Study ID            | Vaccine Name  | Symptomatic COVID-19          |                          | Serious Adverse Events        |                          | Symptomatic COVID-19          |                          |
|---------------------|---------------|-------------------------------|--------------------------|-------------------------------|--------------------------|-------------------------------|--------------------------|
|                     |               | (adults)                      |                          | (adults)                      |                          | (elderly)                     |                          |
|                     |               | Intervention<br>(cases/total) | Control<br>(cases/total) | Intervention<br>(cases/total) | Control<br>(cases/total) | Intervention<br>(cases/total) | Control<br>(cases/total) |
| Ella,2021           | BBV152        | 24/8471                       | 106/8502                 | 39/12879                      | 60/12874                 | 5/893                         | 16/965                   |
| Kaabi,2021          | WIBP-CorV     | 26/12743                      | 95/12737                 | 64/13464                      | 78/13453                 | -                             | -                        |
| Kaabi,2021          | BBIBP-CorV    | 21/12726                      | 95/12737                 | 59/13471                      | 78/13453                 | -                             | -                        |
| Tanriover,2021      | CoronaVac     | 9/6559                        | 32/3470                  | 6/6646                        | 5/3568                   | -                             | -                        |
| Palacios,2021       | CoronaVac     | 85/4953                       | 168/4870                 | 33/6202                       | 31/6194                  | 2/212                         | 4/207                    |
| Fadlyana,2021       | CoronaVac     | 7/798                         | 18/804                   | -                             | -                        | -                             | -                        |
| Khairullin,2022     | QazCovid-in   | 31/2400                       | 43/600                   | -                             | -                        | -                             | -                        |
| Mohraz,2023         | BIV1-CovIran  | 758/12945                     | 688/6456                 | 83/13335                      | 74/6665                  | 105/2234                      | 116/1064                 |
| Sahly,2021          | mRNA-1273     | 55/14287                      | 744/14164                | 104/15162                     | 98/15184                 | 9/14287                       | 100/14164                |
| Polack,2020         | BNT162b2      | 8/17411                       | 162/17511                | 126/21621                     | 111/21631                | 3/7500                        | 48/7543                  |
| Kremsner,2022       | CVnCoV        | 82/12851                      | 145/12211                | 82/19783                      | 66/19746                 | 12/1319                       | 9/1180                   |
| Khobragade,<br>2022 | ZyCoV-D       | 20/12350                      | 61/12320                 | -                             | -                        | -                             | -                        |
| Logunov,2021        | Gam-COVID-Vac | 13/14094                      | 47/4601                  | 45/16427                      | 23/5435                  | 2/1611                        | 8/533                    |
| Sadoff,2022         | Ad26.COVS.S   | 495/19400                     | 1082/19398               | 223/3356                      | 265/3380                 | 36/6764                       | 120/6762                 |

|                |              |           |           |           |           |         |         |
|----------------|--------------|-----------|-----------|-----------|-----------|---------|---------|
| Voysey,2021    | AZD1222      | 74/7201   | 197/7179  | 108/12282 | 127/11962 | -       | -       |
| Falsey,2021    | AZD1222      | 73/17662  | 130/8550  | 101/8771  | 53/3201   | 5/3696  | 14/1812 |
| Halperin,2022  | Ad5-nCoV     | 77/14591  | 211/14586 | 14/18363  | 10/18354  | 10/1323 | 21/1347 |
| Heath,2021     | NVX-CoV2373  | 10/7020   | 96/7019   | 41/7569   | 41/7570   | 1/1953  | 9/1957  |
| Dunkle,2022    | NVX-CoV2373  | 14/17312  | 63/8140   | 169/19729 | 94/9853   | 2/2048  | 2/946   |
| Bravo,2022     | SCB-2019     | 52/6251   | 155/6104  | 49/15064  | 59/15064  | -       | -       |
| Dai,2022       | ZF2001       | 158/12625 | 580/12568 | 199/14448 | 264/14425 | 8/704   | 20/722  |
| Tabarsi,2022   | SpikoGen     | 247/9998  | 119/3069  | 71/12657  | 25/4219   | -       | -       |
| Bernal,2023    | Abdala       | 11/19689  | 142/19674 | 7/24146   | 7/24144   | 7/9927  | 66/9874 |
| Ryzhikov,2023  | EpiVacCorona | 58/2148   | 89/649    | -         | -         | -       | -       |
| Mostafavi,2023 | Soberana     | 75/4800   | 51/1200   | 3/4790    | 2/1197    | -       | -       |
| Hager,2022     | CoVLP+AS03   | 40/12074  | 125/12067 | 24/12036  | 16/12040  | 1/62    | 1/65    |

-, missing data

**Table S3.** Definition, time horizon, and follow-up time of efficacy outcome

| <b>Study ID</b>  | <b>Vaccine Name</b> | <b>Definition of symptomatic COVID-19</b>                                                                                                                                                                                                                                                                                                                                                             | <b>Time horizon of efficacy assessment</b>                                                                                                                                                                                                                             | <b>Follow-up time*</b>               |                |
|------------------|---------------------|-------------------------------------------------------------------------------------------------------------------------------------------------------------------------------------------------------------------------------------------------------------------------------------------------------------------------------------------------------------------------------------------------------|------------------------------------------------------------------------------------------------------------------------------------------------------------------------------------------------------------------------------------------------------------------------|--------------------------------------|----------------|
| Ella, 2021       | BBV152              | At least one symptoms condition for 1-2 days or more:<br>(1) at least two consecutive days with one or more specific symptoms (cough, newly developed taste or smell disorders, shortness of breath or dyspnea);<br>(2) with two or more non-specific symptoms (fever, chills, sore throat, fatigue, nasal congestion or runny nose, body pain, muscle pain, headache, nausea or vomiting, diarrhoea. | At least 14 days after the last dose                                                                                                                                                                                                                                   | 99 days                              |                |
| Kaabi, 2021      | WIBP-CorV           |                                                                                                                                                                                                                                                                                                                                                                                                       | At least 14 days after the last dose                                                                                                                                                                                                                                   | 77 days                              |                |
| Kaabi, 2021      | BBIBP-CorV          |                                                                                                                                                                                                                                                                                                                                                                                                       | At least 14 days after the last dose                                                                                                                                                                                                                                   | 77 days                              |                |
| Palacios, 2021   | CoronaVac           |                                                                                                                                                                                                                                                                                                                                                                                                       | At least 14 days after the last dose                                                                                                                                                                                                                                   | About 76 days                        |                |
| Fadlyana, 2021   | CoronaVac           |                                                                                                                                                                                                                                                                                                                                                                                                       | At least 14 days after the last dose                                                                                                                                                                                                                                   | 75 days                              |                |
| Mohraz, 2023     | BIV1-CovIran        |                                                                                                                                                                                                                                                                                                                                                                                                       | At least 14 days after the last dose                                                                                                                                                                                                                                   | 83 days                              |                |
| Sahly, 2021      | mRNA-1273           |                                                                                                                                                                                                                                                                                                                                                                                                       | At least 14 days after the last dose                                                                                                                                                                                                                                   | 169 days                             |                |
| Bravo, 2022      | SCB-2019            |                                                                                                                                                                                                                                                                                                                                                                                                       | At least 14 days after the last dose                                                                                                                                                                                                                                   | 68 days                              |                |
| Tabarsi, 2022    | SpikoGen            |                                                                                                                                                                                                                                                                                                                                                                                                       | At least 14 days after the last dose                                                                                                                                                                                                                                   | 55 days                              |                |
| Bernal, 2023     | Abdala              |                                                                                                                                                                                                                                                                                                                                                                                                       | At least 14 days after the last dose                                                                                                                                                                                                                                   | 33 days                              |                |
| Mostafavi,2023   | Soberana            |                                                                                                                                                                                                                                                                                                                                                                                                       | At least 14 days after the last dose                                                                                                                                                                                                                                   | 142 days                             |                |
| Khairullin, 2022 | QazCovid-in         |                                                                                                                                                                                                                                                                                                                                                                                                       | At least one of the following symptoms for 1-2 days or more: fever or chills; cough; dyspnoea; fatigue; muscle or body pain; headache; new loss of sense of smell or change in taste; sore throat; nasal congestion or rhinorrhoea; nausea or vomiting; and diarrhoea. | At least 14 days after the last dose | About 159 days |
| Tanriover, 2021  | CoronaVac           |                                                                                                                                                                                                                                                                                                                                                                                                       |                                                                                                                                                                                                                                                                        | At least 14 days after the last dose | 62 days        |
| Polack, 2020     | BNT162b2            | At least 7 days after the last dose                                                                                                                                                                                                                                                                                                                                                                   |                                                                                                                                                                                                                                                                        | About 91 days                        |                |
| Kremsner, 2022   | CVnCoV              | At least 15 days after the last dose                                                                                                                                                                                                                                                                                                                                                                  |                                                                                                                                                                                                                                                                        | 48.2 days                            |                |

|                  |               |   |                                      |                |
|------------------|---------------|---|--------------------------------------|----------------|
| Sadoff, 2022     | Ad26.COVS.S   |   | At least 14 days after the last dose | 120 days       |
| Voysey, 2021     | AZD1222       |   | At least 14 days after the last dose | About 90 days  |
| Falsey, 2021     | AZD1222       |   | At least 15 days after the last dose | 46 days        |
| Halperin, 2022   | Ad5-nCoV      |   | At least 14 days after the last dose | 38 days        |
| Heath, 2021      | NVX-CoV2373   |   | At least 28 days after the last dose | 62 days        |
| Dunkle, 2022     | NVX-CoV2373   |   | At least 7 days after the last dose  | About 60 days  |
| Dai, 2022        | ZF2001        |   | At least 7 days after the last dose  | About 180 days |
| Hager, 2022      | CoVLP+AS03    |   | At least 7 days after the last dose  | 45 days        |
| Ryzhikov, 2023   | EpiVacCorona  | - | At least 21 days after the last dose | About 138 days |
| Khobragade, 2022 | ZyCoV-D       | - | At least 28 days after the last dose | About 62 days  |
| Logunov, 2021    | Gam-COVID-Vac | - | At least 7 days after the last dose  | 20 days        |

\* The follow-up time is calculated from 7 to 28 days after the last dose.

-, missing data.

**Figure S1.** Comparison of demographic information of included studies. (A) Sex (B) Race. Data missing: Ella, 2021; Kaabi, 2021; Tanriover, 2021; Fadlyana, 2021; Khobragade,2022; Kremsner, 2022; Khairullin, 2022; Mohraz, 2023; Ryzhikov, 2023; Mostafavi, 2023; Tabarsi, 2022 (C) Mean age. Data missing: Heath, 2021; Sadoff, 2022; Polack, 2020; Tanriover, 2021; Voysey, 2021; Dunkle, 2021; Khairullin, 2022

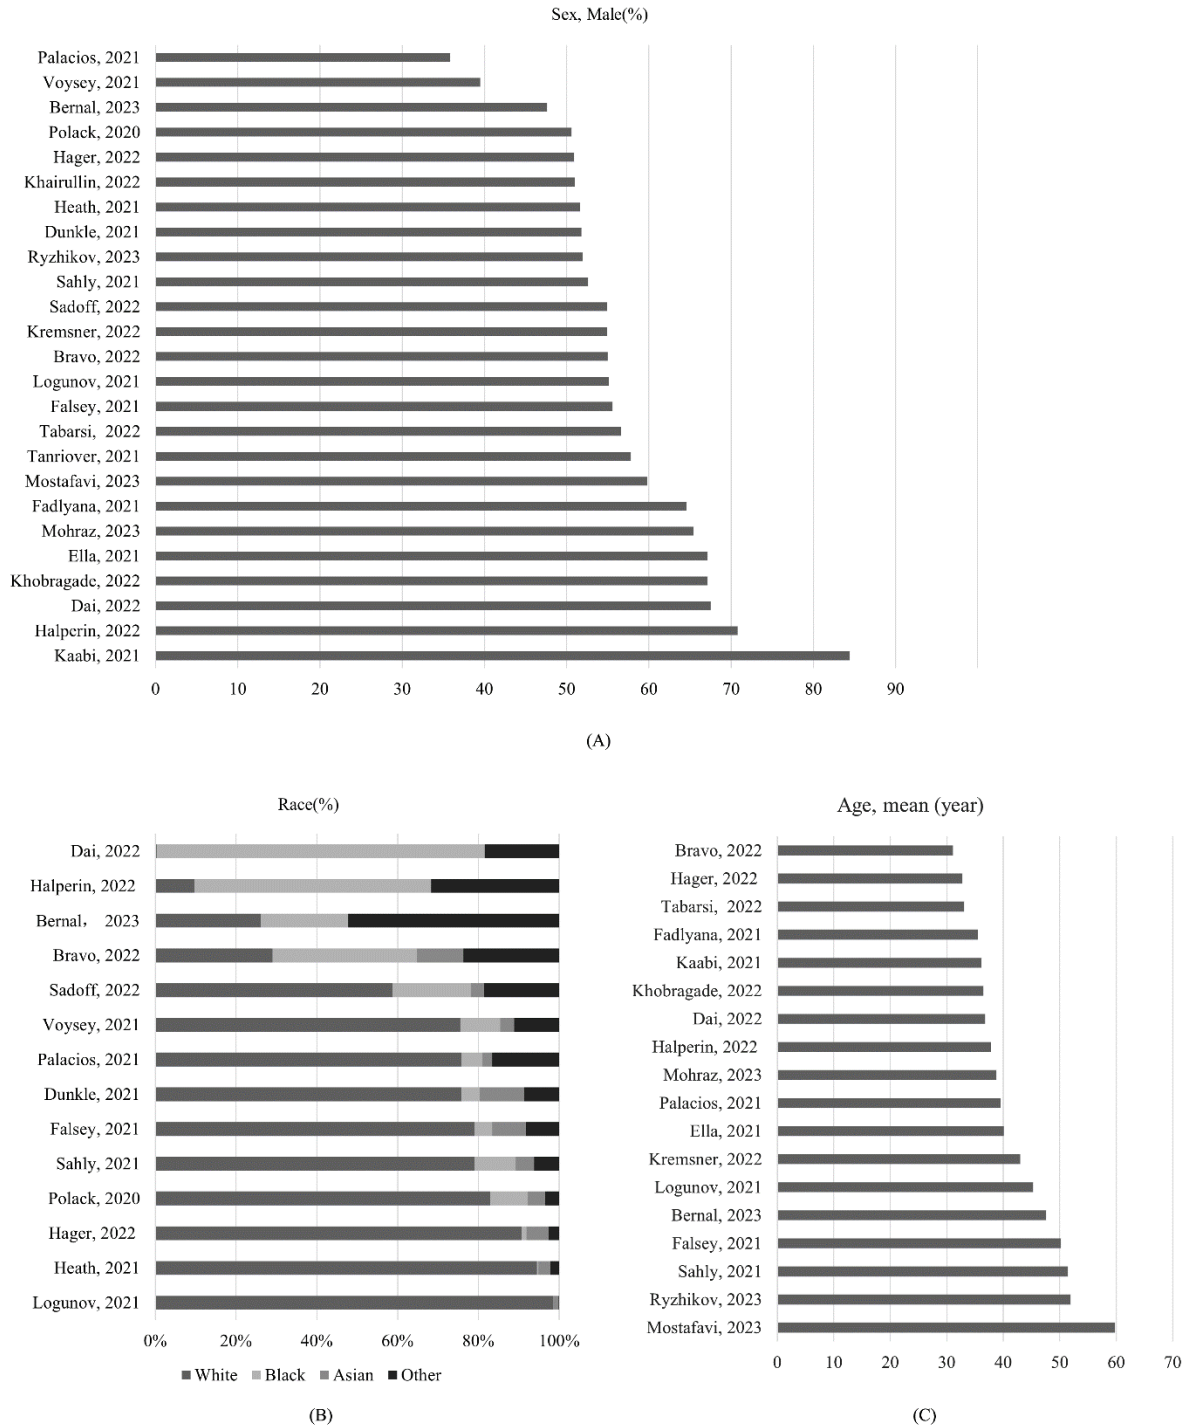



**Figure S2.** Overall risk of bias assessment using Version 2 of the Cochrane tool for assessing risk of bias in randomized trials. (A) Overall risk of bias assessment using the Cochrane tool. (B) Risk of bias assessment by individual trials

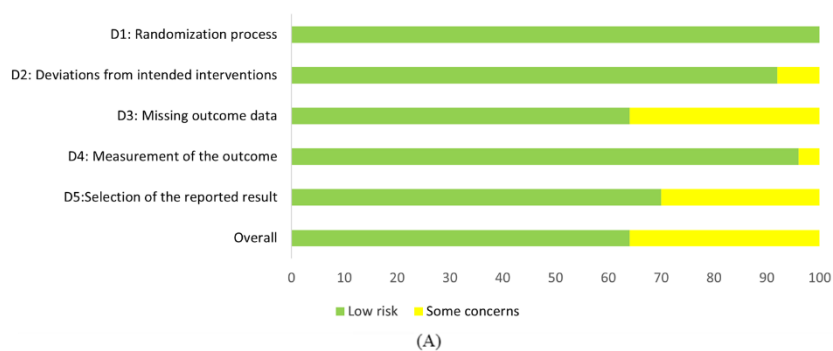

| Study ID        | D1 | D2 | D3 | D4 | D5 | Overall |
|-----------------|----|----|----|----|----|---------|
| Ella,2021       | +  | +  | +  | +  | +  | +       |
| Kaabi,2021      | +  | +  | ?  | +  | ?  | ?       |
| Tanriover,2021  | +  | +  | ?  | +  | ?  | ?       |
| Palacios,2021   | +  | +  | +  | +  | +  | +       |
| Sahly,2021      | +  | +  | +  | +  | +  | +       |
| Polack,2020     | +  | +  | +  | +  | +  | +       |
| Logunov,2021    | +  | +  | ?  | +  | ?  | ?       |
| Sadoff,2022     | +  | +  | +  | +  | +  | +       |
| Voysey,2021     | +  | ?  | ?  | +  | ?  | ?       |
| Heath,2021      | +  | +  | ?  | +  | +  | ?       |
| Dunkel,2021     | +  | +  | ?  | +  | +  | ?       |
| Dai,2022        | +  | +  | +  | +  | +  | +       |
| Fadlyana,2021   | +  | +  | ?  | +  | ?  | ?       |
| Falsey,2021     | +  | +  | +  | +  | +  | +       |
| Hager,2022      | +  | +  | +  | +  | +  | +       |
| Halperin,2022   | +  | +  | +  | +  | +  | +       |
| Khobragade,2022 | +  | +  | ?  | +  | ?  | ?       |
| Kremsner,2022   | +  | +  | +  | +  | +  | +       |
| Bravo,2022      | +  | +  | +  | +  | +  | +       |
| Khairullin,2022 | +  | ?  | ?  | +  | +  | ?       |
| Mohraz, 2023    | +  | +  | +  | +  | +  | +       |
| Tabarsi, 2022   | +  | +  | +  | +  | +  | +       |
| Bernal, 2023    | +  | +  | +  | +  | +  | +       |
| Ryzhikov, 2023  | +  | +  | ?  | +  | +  | +       |
| Mostafavi, 2023 | +  | +  | +  | +  | +  | +       |

(B)

**Table S4.** Comprehensive comparisons for type-specific efficacy.

|                       |                    |                            |                             |                                |                     |
|-----------------------|--------------------|----------------------------|-----------------------------|--------------------------------|---------------------|
| <b>Placebo</b>        |                    |                            |                             |                                |                     |
|                       | <b>DNA vaccine</b> |                            |                             |                                |                     |
| 3.53<br>(2.05, 6.05)  |                    | <b>Inactivated vaccine</b> |                             |                                |                     |
| 3.53<br>(1.84, 6.89)  |                    |                            | <b>Viral vector vaccine</b> |                                |                     |
| 4.44<br>(2.69, 7.39)  |                    |                            |                             | <b>Protein subunit vaccine</b> |                     |
| 7.61<br>(3.22, 18.54) |                    |                            |                             |                                | <b>mRNA vaccine</b> |

Data are RRs (95% CI) in the column-defining intervention compared with the row-defining intervention. RR higher than 1 favors the row-defining intervention. To obtain RRs for comparisons in the opposite direction, reciprocals should be taken. Results without statistical significance were deleted from the table.

**Table S5.** SUCRA value of various types of vaccines in the network meta-analysis of type-specific efficacy.

| Vaccine Type            | SUCRA value |
|-------------------------|-------------|
| Placebo                 | 0.99        |
| DNA vaccine             | 0.55        |
| Inactivated vaccine     | 0.52        |
| Viral vector vaccine    | 0.51        |
| Protein subunit vaccine | 0.35        |
| mRNA vaccine            | 0.09        |

**Figure S3.** Network diagram of type-specific safety. The thickness of the lines is proportional to the number of trials comparing every pair of treatments.

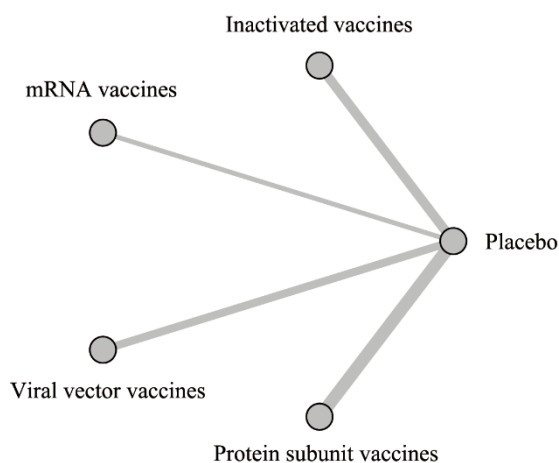

**Table S6.** SUCRA value of various types of vaccines in the network meta-analysis of type-specific safety.

| Vaccine Type            | SUCRA value |
|-------------------------|-------------|
| mRNA vaccine            | 0.98        |
| Placebo                 | 0.76        |
| Protein subunit vaccine | 0.4         |
| Viral vector vaccine    | 0.31        |
| Inactivated vaccine     | 0.04        |

**Table S7.** Comprehensive comparisons for type-specific safety.

| mRNA vaccine         | Placebo              | Protein subunit vaccine | Viral vector vaccine | Inactivated vaccine |
|----------------------|----------------------|-------------------------|----------------------|---------------------|
| 1.34<br>(1.08, 1.63) | 1.17<br>(1.04, 1.32) |                         |                      |                     |
| 1.38<br>(1.13, 1.70) | 1.22<br>(1.07, 1.38) |                         |                      |                     |
| 1.57<br>(1.25, 1.97) | 1.38<br>(1.17, 1.63) |                         |                      |                     |

Data are RRs (95% CI) in the column-defining intervention compared with the row-defining intervention. RR higher than 1 favors the row-defining intervention. To obtain RRs for comparisons in the opposite direction, reciprocals should be taken. Results without statistical significance were deleted from the table.

**Figure S4.** Funnel plot and Egger's test of vaccine efficacy and safety. (A) Funnel plot and Egger's test of vaccine efficacy. (B) Funnel plot and Egger's test of vaccine safety.

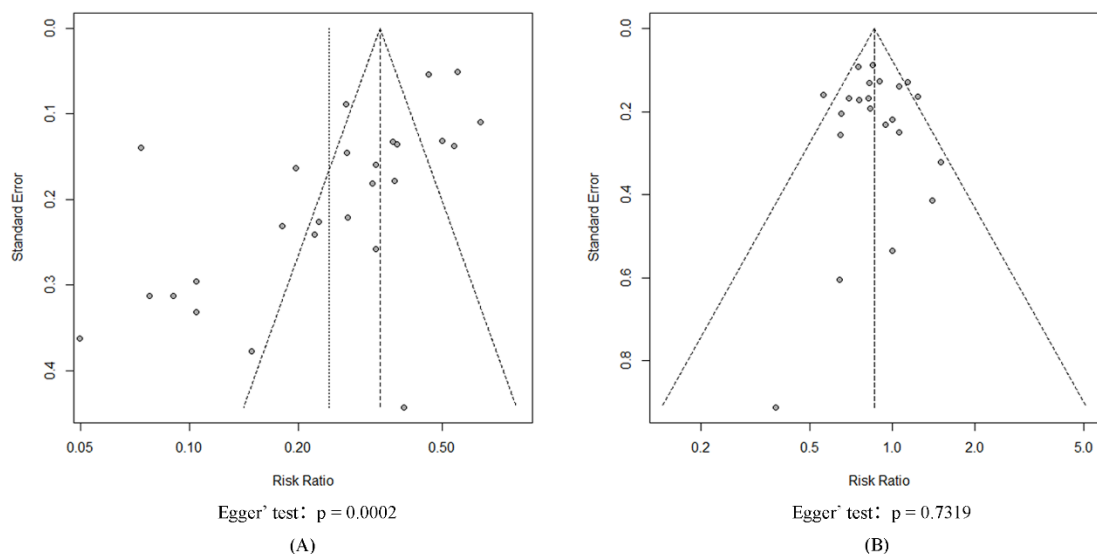

**Table S8** Comprehensive comparisons for efficacy of individual vaccines in adults

|                         |                        |                        |                        |                       |                       |                       |                       |                       |                       |                       |                       |                       |                       |                       |                       |                      |                      |  |             |               |        |           |          |  |
|-------------------------|------------------------|------------------------|------------------------|-----------------------|-----------------------|-----------------------|-----------------------|-----------------------|-----------------------|-----------------------|-----------------------|-----------------------|-----------------------|-----------------------|-----------------------|----------------------|----------------------|--|-------------|---------------|--------|-----------|----------|--|
| Placebo                 |                        |                        |                        |                       |                       |                       |                       |                       |                       |                       |                       |                       |                       |                       |                       |                      |                      |  |             |               |        |           |          |  |
| 1.55<br>(1.26, 1.93)    | SpikoGen               |                        |                        |                       |                       |                       |                       |                       |                       |                       |                       |                       |                       |                       |                       |                      |                      |  |             |               |        |           |          |  |
| 1.80<br>(1.65, 1.99)    |                        | BIV1-Covifran          |                        |                       |                       |                       |                       |                       |                       |                       |                       |                       |                       |                       |                       |                      |                      |  |             |               |        |           |          |  |
| 1.86<br>(1.42, 2.44)    |                        |                        | CVnCoV                 |                       |                       |                       |                       |                       |                       |                       |                       |                       |                       |                       |                       |                      |                      |  |             |               |        |           |          |  |
| 2.18<br>(1.95, 2.41)    | 1.39<br>(1.09, 1.77)   | 1.20<br>(1.04, 1.38)   |                        | Ad26-COV2-S           |                       |                       |                       |                       |                       |                       |                       |                       |                       |                       |                       |                      |                      |  |             |               |        |           |          |  |
| 2.39<br>(1.88, 3.00)    | 1.52<br>(1.11, 2.10)   | 1.31<br>(1.02, 1.70)   |                        |                       | CoronaVac             |                       |                       |                       |                       |                       |                       |                       |                       |                       |                       |                      |                      |  |             |               |        |           |          |  |
| 2.69<br>(1.90, 3.82)    | 1.72<br>(1.14, 2.59)   | 1.48<br>(1.03, 2.12)   |                        |                       |                       | Soberana              |                       |                       |                       |                       |                       |                       |                       |                       |                       |                      |                      |  |             |               |        |           |          |  |
| 2.75<br>(2.12, 3.56)    | 1.75<br>(1.25, 2.46)   | 1.51<br>(1.14, 1.99)   | 1.46<br>(1.01, 2.14)   |                       |                       |                       | Ad5-nCoV              |                       |                       |                       |                       |                       |                       |                       |                       |                      |                      |  |             |               |        |           |          |  |
| 3.06<br>(2.25, 4.22)    | 1.95<br>(1.35, 2.89)   | 1.68<br>(1.22, 2.34)   | 1.63<br>(1.08, 2.48)   | 1.39<br>(1.01, 1.95)  |                       |                       |                       | SCB-2019              |                       |                       |                       |                       |                       |                       |                       |                      |                      |  |             |               |        |           |          |  |
| 3.06<br>(1.88, 5.21)    | 1.97<br>(1.15, 3.49)   | 1.68<br>(1.02, 2.92)   |                        |                       |                       |                       |                       |                       | ZyCoV-D               |                       |                       |                       |                       |                       |                       |                      |                      |  |             |               |        |           |          |  |
| 3.10<br>(2.56, 3.78)    | 1.97<br>(1.49, 2.66)   | 1.70<br>(1.36, 2.12)   | 1.67<br>(1.19, 2.32)   | 1.42<br>(1.14, 1.77)  |                       |                       |                       |                       |                       | AZD1222               |                       |                       |                       |                       |                       |                      |                      |  |             |               |        |           |          |  |
| 3.13<br>(2.20, 4.53)    | 1.99<br>(1.32, 3.06)   | 1.72<br>(1.20, 2.51)   | 1.68<br>(1.07, 2.64)   | 1.43<br>(1.01, 2.10)  |                       |                       |                       |                       |                       |                       | CoVLP+AS03            |                       |                       |                       |                       |                      |                      |  |             |               |        |           |          |  |
| 3.67<br>(2.41, 5.75)    | 2.34<br>(1.46, 3.86)   | 2.01<br>(1.31, 3.19)   | 1.97<br>(1.19, 3.35)   | 1.68<br>(1.09, 2.66)  |                       |                       |                       |                       |                       |                       |                       | WIBP-CorV             |                       |                       |                       |                      |                      |  |             |               |        |           |          |  |
| 3.67<br>(3.10, 4.39)    | 2.34<br>(1.79, 3.10)   | 2.01<br>(1.65, 2.46)   | 1.97<br>(1.42, 2.72)   | 1.68<br>(1.38, 2.05)  | 1.54<br>(1.15, 2.05)  |                       |                       |                       |                       |                       |                       |                       | ZF2001                |                       |                       |                      |                      |  |             |               |        |           |          |  |
| 4.44<br>(2.89, 7.10)    | 2.83<br>(1.75, 4.71)   | 2.44<br>(1.57, 3.94)   | 2.39<br>(1.43, 4.10)   | 2.01<br>(1.31, 3.25)  | 1.86<br>(1.14, 3.13)  |                       |                       |                       |                       |                       |                       |                       |                       | BBV152                |                       |                      |                      |  |             |               |        |           |          |  |
| 4.57<br>(2.89, 7.54)    | 2.92<br>(1.77, 5.00)   | 2.51<br>(1.57, 4.18)   | 2.44<br>(1.43, 4.31)   | 2.08<br>(1.31, 3.46)  | 1.92<br>(1.14, 3.32)  |                       |                       |                       |                       |                       |                       |                       |                       |                       | BBIBP-CorV            |                      |                      |  |             |               |        |           |          |  |
| 5.05<br>(3.67, 7.03)    | 3.22<br>(2.20, 4.76)   | 2.77<br>(1.99, 3.90)   | 2.72<br>(1.79, 4.14)   | 2.32<br>(1.67, 3.25)  | 2.12<br>(1.42, 3.16)  | 1.88<br>(1.17, 3.00)  | 1.84<br>(1.22, 2.77)  | 1.65<br>(1.05, 2.56)  |                       | 1.62<br>(1.12, 2.36)  |                       |                       |                       |                       |                       | EpiVac Corona        |                      |  |             |               |        |           |          |  |
| 5.53<br>(3.53, 8.76)    | 3.53<br>(2.14, 5.87)   | 3.03<br>(1.92, 4.90)   | 2.97<br>(1.75, 5.05)   | 2.53<br>(1.58, 4.06)  | 2.32<br>(1.39, 3.90)  | 2.03<br>(1.15, 3.67)  | 2.01<br>(1.20, 3.42)  | 1.80<br>(1.04, 3.13)  |                       | 1.77<br>(1.08, 2.94)  |                       |                       |                       |                       |                       |                      | QazCovid-in          |  |             |               |        |           |          |  |
| 9.68<br>(6.36, 15.18)   | 6.17<br>(3.86, 10.18)  | 5.31<br>(3.46, 8.41)   | 5.21<br>(3.16, 8.76)   | 4.39<br>(2.89, 7.03)  | 4.06<br>(2.51, 6.75)  | 3.56<br>(2.08, 6.36)  | 3.53<br>(2.14, 5.93)  | 3.16<br>(1.86, 5.42)  | 3.13<br>(1.58, 6.11)  | 3.10<br>(1.95, 5.10)  | 3.06<br>(1.77, 5.42)  | 2.61<br>(1.42, 4.85)  | 2.61<br>(1.67, 4.26)  | 2.16<br>(1.16, 4.06)  | 2.12<br>(1.11, 4.01)  | 1.90<br>(1.12, 3.29) |                      |  | NVX-CoV2373 |               |        |           |          |  |
| 11.25<br>(6.23, 21.76)  | 7.17<br>(3.82, 14.44)  | 6.17<br>(3.39, 12.06)  | 6.05<br>(3.13, 12.30)  | 5.10<br>(2.83, 10.07) | 4.71<br>(2.48, 9.49)  | 4.14<br>(2.10, 8.76)  | 4.10<br>(2.14, 8.33)  | 3.67<br>(1.88, 7.61)  | 3.63<br>(1.65, 8.33)  | 3.60<br>(1.93, 7.17)  | 3.56<br>(1.79, 7.54)  | 3.03<br>(1.45, 6.62)  | 3.03<br>(1.65, 6.05)  | 2.51<br>(1.20, 5.53)  | 2.46<br>(1.14, 5.47)  | 2.20<br>(1.13, 4.57) |                      |  |             | Gam-COVID-Vac |        |           |          |  |
| 13.20<br>(7.46, 26.05)  | 8.50<br>(4.62, 17.29)  | 7.24<br>(4.06, 14.44)  | 7.10<br>(3.74, 14.73)  | 6.05<br>(3.39, 12.06) | 5.53<br>(2.97, 11.36) | 4.90<br>(2.51, 10.49) | 4.81<br>(2.56, 9.97)  | 4.31<br>(2.23, 9.03)  | 4.31<br>(1.95, 9.87)  | 4.26<br>(2.32, 8.58)  | 4.22<br>(2.14, 9.03)  | 3.60<br>(1.73, 7.92)  | 3.60<br>(1.97, 7.24)  | 2.97<br>(1.42, 6.62)  | 2.89<br>(1.35, 6.49)  | 2.61<br>(1.35, 5.47) | 2.39<br>(1.14, 5.37) |  |             |               | Abdala |           |          |  |
| 13.60<br>(10.49, 18.17) | 8.76<br>(6.23, 12.43)  | 7.54<br>(5.64, 10.07)  | 7.32<br>(5.00, 10.80)  | 6.23<br>(4.71, 8.41)  | 5.70<br>(4.01, 8.25)  | 5.05<br>(3.25, 7.92)  | 4.95<br>(3.42, 7.32)  | 4.44<br>(2.94, 6.75)  | 4.44<br>(2.44, 7.85)  | 4.39<br>(3.16, 6.17)  | 4.35<br>(2.77, 6.82)  | 3.71<br>(2.20, 6.17)  | 3.71<br>(2.69, 5.16)  | 3.06<br>(1.8, 5.1)    | 2.97<br>(1.70, 5.10)  | 2.69<br>(1.77, 4.14) | 2.46<br>(1.45, 4.18) |  |             |               |        | mRNA-1273 |          |  |
| 20.91<br>(10.91, 46.99) | 13.33<br>(6.69, 30.57) | 11.47<br>(5.93, 25.79) | 11.25<br>(5.53, 26.05) | 8.76<br>(4.95, 21.54) | 7.69<br>(4.35, 20.09) | 7.61<br>(3.67, 18.54) | 7.61<br>(3.74, 17.64) | 6.82<br>(3.29, 16.12) | 6.75<br>(2.92, 17.29) | 6.69<br>(3.39, 15.33) | 6.62<br>(3.13, 15.96) | 5.64<br>(2.56, 14.01) | 5.64<br>(2.89, 12.81) | 4.71<br>(2.10, 11.59) | 4.57<br>(2.01, 11.47) | 4.10<br>(1.97, 9.68) | 3.78<br>(1.68, 9.39) |  |             |               |        |           | BNT162b2 |  |

Data are RRs (95% CI) in the column-defining intervention compared with the row-defining intervention. RR higher than 1 favors the row-defining intervention. To obtain RRs for comparisons in the opposite direction, reciprocals should be taken. Results without statistical significance were deleted from the table.

**Table S9.** SUCRA value of various vaccines in the network meta-analysis of vaccine efficacy in adults.

| Vaccine       | SUCRA value |
|---------------|-------------|
| Placebo       | 1           |
| SpikoGen      | 0.94        |
| BIV1-CovIran  | 0.89        |
| CVnCoV        | 0.87        |
| Ad26-COV2-S   | 0.8         |
| CoronaVac     | 0.74        |
| Soberana      | 0.66        |
| Ad5-nCoV      | 0.65        |
| SCB-2019      | 0.58        |
| ZyCoV-D       | 0.57        |
| AZD1222       | 0.57        |
| CoVLP+AS03    | 0.56        |
| WIBP-CorV     | 0.46        |
| ZF2001        | 0.45        |
| BBV152        | 0.36        |
| BBIBP-CorV    | 0.35        |
| EpiVacCorona  | 0.3         |
| QazCovid-in   | 0.28        |
| NVX-CoV2373   | 0.15        |
| Gam-COVID-Vac | 0.12        |
| Abdala        | 0.09        |
| mRNA-1273     | 0.08        |
| BNT162b2      | 0.02        |

**Figure S5.** Network diagram of individual vaccine safety in adults. The thickness of the lines is proportional to the number of trials comparing every pair of treatments.

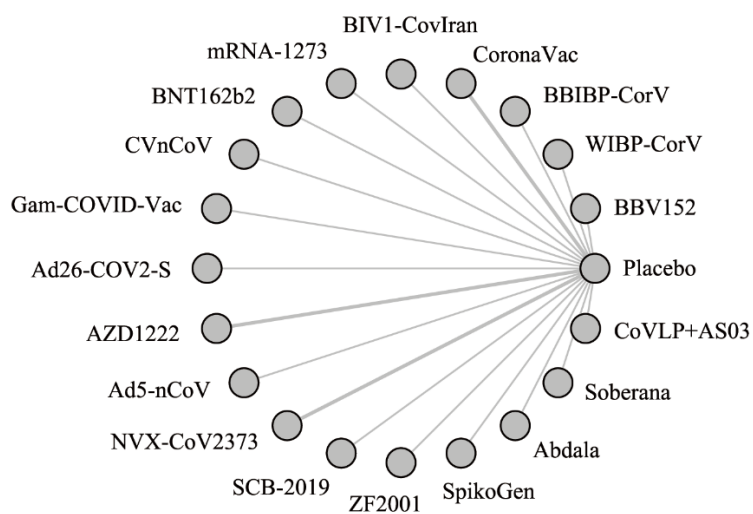



**Table S11.** SUCRA value of various vaccines in the network meta-analysis of vaccine safety in adults.

| Vaccine       | SUCRA value |
|---------------|-------------|
| CoVLP+AS03    | 0.89        |
| CVnCoV        | 0.84        |
| Ad5-nCoV      | 0.82        |
| BNT162b2      | 0.78        |
| mRNA-1273     | 0.71        |
| Placebo       | 0.67        |
| CoronaVac     | 0.62        |
| SpikoGen      | 0.58        |
| Abdala        | 0.57        |
| NVX-CoV2373   | 0.56        |
| Ad26-COV2-S   | 0.44        |
| SCB-2019      | 0.43        |
| WIBP-CorV     | 0.41        |
| AZD1222       | 0.34        |
| BBIBP-CorV    | 0.32        |
| ZF2001        | 0.3         |
| Gam-COVID-Vac | 0.22        |
| Soberana      | 0.21        |
| BBV152        | 0.2         |
| BIV1-CovIran  | 0.1         |

**Figure S6.** Network diagram of type-specific efficacy in the elderly. The thickness of the lines is proportional to the number of trials comparing every pair of treatments.

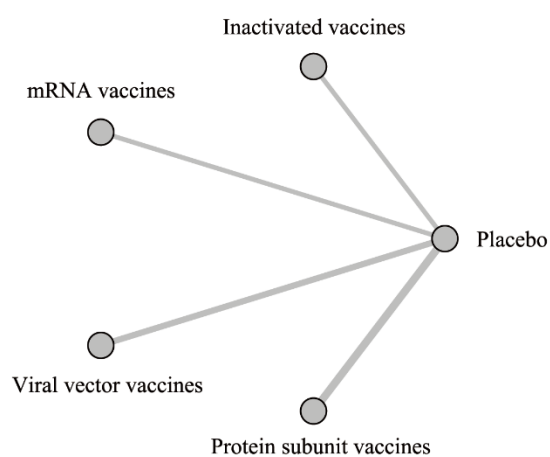

**Table S12.** Comprehensive comparisons for type-specific efficacy in the elderly.

|                       |                            |                                |                             |                     |
|-----------------------|----------------------------|--------------------------------|-----------------------------|---------------------|
| <b>Placebo</b>        |                            |                                |                             |                     |
|                       | <b>Inactivated vaccine</b> |                                |                             |                     |
| 4.35<br>(1.34, 13.87) |                            | <b>Protein subunit vaccine</b> |                             |                     |
| 4.35<br>(1.43, 14.15) |                            |                                | <b>Viral vector vaccine</b> |                     |
| 5.42<br>(1.49, 19.89) |                            |                                |                             | <b>mRNA vaccine</b> |

Data are RRs (95% CI) in the column-defining intervention compared with the row-defining intervention. RR higher than 1 favors the row-defining intervention. To obtain RRs for comparisons in the opposite direction, reciprocals should be taken. Results without statistical significance were deleted from the table.

**Table S13.** SUCRA value of various types of vaccines in the network meta-analysis of type-specific efficacy in the elderly.

| Vaccine Type            | SUCRA value |
|-------------------------|-------------|
| Placebo                 | 0.98        |
| Inactivated vaccine     | 0.6         |
| Protein subunit vaccine | 0.342       |
| Viral vector vaccine    | 0.342       |
| mRNA vaccine            | 0.24        |

**Figure S7.** Funnel plot and Egger's test of vaccine efficacy in the elderly.

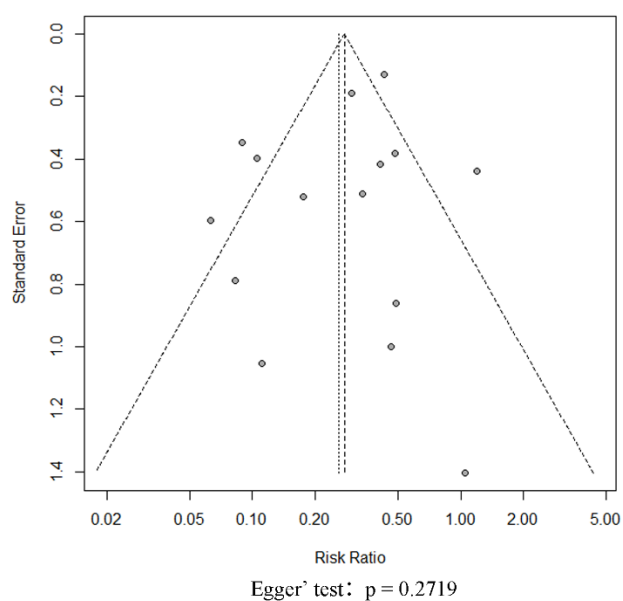



**Figure S8.** Network diagram of individual vaccine efficacy in the elderly. The thickness of the lines is proportional to the number of trials comparing every pair of treatments.

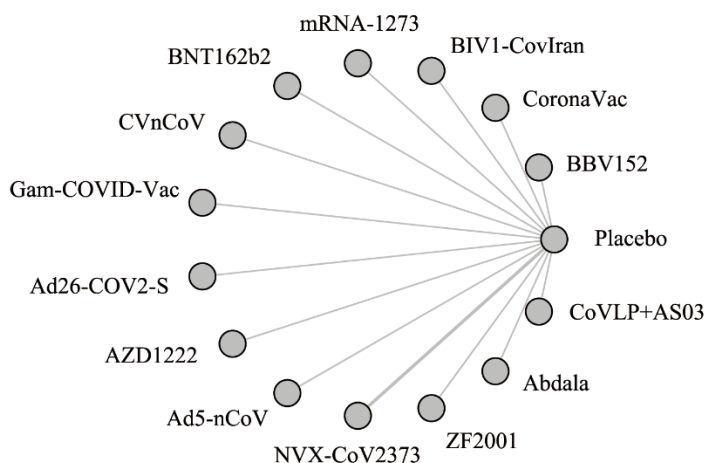

**Table S14.** SUCRA value of various vaccines in the network meta-analysis of vaccine efficacy in the elderly.

| Vaccine       | SUCRA value |
|---------------|-------------|
| CVnCoV        | 0.92        |
| Placebo       | 0.9         |
| CoVLP+AS03    | 0.76        |
| Ad5-nCoV      | 0.68        |
| BIV1-CovIran  | 0.66        |
| CoronaVac     | 0.63        |
| ZF2001        | 0.62        |
| BBV152        | 0.54        |
| Ad26-COV2-S   | 0.5         |
| NVX-CoV2373   | 0.38        |
| AZD1222       | 0.33        |
| Abdala        | 0.19        |
| mRNA-1273     | 0.15        |
| Gam-COVID-Vac | 0.15        |
| BNT162b2      | 0.08        |

**Table S15.** Comprehensive comparisons for efficacy of individual vaccines in the elderly

|                         |                         |                    |                       |                       |  |  |                       |                       |                       |                  |               |               |                    |                    |                |               |                  |  |                      |                 |
|-------------------------|-------------------------|--------------------|-----------------------|-----------------------|--|--|-----------------------|-----------------------|-----------------------|------------------|---------------|---------------|--------------------|--------------------|----------------|---------------|------------------|--|----------------------|-----------------|
| <b>CVnCoV</b>           |                         |                    |                       |                       |  |  |                       |                       |                       |                  |               |               |                    |                    |                |               |                  |  |                      |                 |
|                         | <b>Placebo</b>          |                    |                       |                       |  |  |                       |                       |                       |                  |               |               |                    |                    |                |               |                  |  |                      |                 |
|                         |                         | <b>CoVLP+ AS03</b> |                       |                       |  |  |                       |                       |                       |                  |               |               |                    |                    |                |               |                  |  |                      |                 |
|                         | 2.10<br>(1.01, 4.66)    |                    | <b>Ad5-nCoV</b>       |                       |  |  |                       |                       |                       |                  |               |               |                    |                    |                |               |                  |  |                      |                 |
| 2.77<br>(1.13, 7.17)    | 2.32<br>(1.79, 2.97)    |                    |                       | <b>BIV1-CovIran</b>   |  |  |                       |                       |                       |                  |               |               |                    |                    |                |               |                  |  |                      |                 |
|                         |                         |                    |                       |                       |  |  |                       |                       |                       | <b>CoronaVac</b> |               |               |                    |                    |                |               |                  |  |                      |                 |
|                         | 2.48<br>(1.14, 6.05)    |                    |                       |                       |  |  |                       |                       |                       |                  | <b>ZF2001</b> |               |                    |                    |                |               |                  |  |                      |                 |
| 3.74<br>(1.02, 15.80)   | 3.10<br>(1.19, 9.68)    |                    |                       |                       |  |  |                       |                       |                       |                  |               | <b>BBV152</b> |                    |                    |                |               |                  |  |                      |                 |
| 4.01<br>(1.57, 10.80)   | 3.35<br>(2.34, 4.95)    |                    |                       |                       |  |  |                       |                       |                       |                  |               |               | <b>Ad26-COV2-S</b> |                    |                |               |                  |  |                      |                 |
| 6.23<br>(1.38, 36.60)   | 5.10<br>(1.52, 24.05)   |                    |                       |                       |  |  |                       |                       |                       |                  |               |               |                    | <b>NVX-CoV2373</b> |                |               |                  |  |                      |                 |
| 7.24<br>(1.92, 30.88)   | 5.99<br>(2.25, 18.92)   |                    |                       |                       |  |  |                       |                       |                       |                  |               |               |                    |                    | <b>AZD1222</b> |               |                  |  |                      |                 |
| 12.06<br>(3.82, 42.10)  | 9.87<br>(4.81, 24.29)   |                    | 4.71<br>(1.58, 14.88) | 4.26<br>(1.97, 10.80) |  |  | 3.97<br>(1.26, 12.94) |                       | 2.94<br>(1.30, 7.69)  |                  |               |               |                    |                    |                | <b>Abdala</b> |                  |  |                      |                 |
| 14.01<br>(4.71, 44.70)  | 11.59<br>(6.17, 24.78)  |                    | 5.53<br>(1.97, 15.80) | 5.00<br>(2.51, 11.13) |  |  | 4.66<br>(1.55, 13.74) | 3.74<br>(1.02, 12.55) | 3.46<br>(1.63, 8.00)  |                  |               |               |                    |                    |                |               | <b>mRNA-1273</b> |  |                      |                 |
| 16.78<br>(3.03, 149.90) | 13.74<br>(3.25, 104.58) |                    | 6.55<br>(1.23, 56.26) | 5.93<br>(1.36, 46.06) |  |  | 5.47<br>(1, 47.94)    |                       |                       |                  |               |               |                    |                    |                |               |                  |  | <b>Gam-COVID-Vac</b> |                 |
| 21.54<br>(5.37, 119.10) | 17.64<br>(6.23, 77.48)  |                    | 8.50<br>(2.25, 42.95) | 7.61<br>(2.59, 34.12) |  |  | 7.10<br>(1.79, 37.71) | 5.75<br>(1.21, 33.12) | 5.26<br>(1.72, 24.05) |                  |               |               |                    |                    |                |               |                  |  |                      | <b>BNT162b2</b> |

Data are RRs (95% CI) in the column-defining intervention compared with the row-defining intervention. RR higher than 1 favors the row-defining intervention. To obtain RRs for comparisons in the opposite direction, reciprocals should be taken. Results without statistical significance were deleted from the table.

**Table S16.** Results of network meta-analysis after excluding trials with a follow-up time of less than 2 months (A) Type-specific efficacy in adults (B) Type-specific safety in adults (C) Type-specific efficacy in the elderly

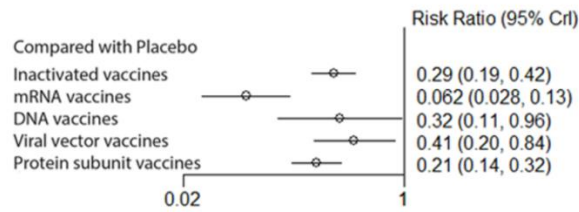

(A)

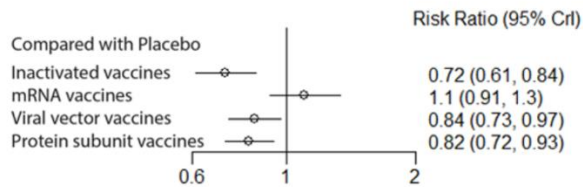

(B)

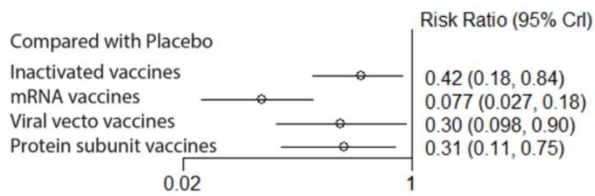

(C)

| Vaccine Type            | SUCRA value |
|-------------------------|-------------|
| Placebo                 | 0.99        |
| Inactivated vaccine     | 0.49        |
| mRNA vaccine            | 0.00        |
| DNA vaccine             | 0.54        |
| Viral vector vaccine    | 0.69        |
| Protein subunit vaccine | 0.28        |

| Vaccine Type            | SUCRA value |
|-------------------------|-------------|
| Placebo                 | 0.79        |
| Inactivated vaccine     | 0.05        |
| mRNA vaccine            | 0.96        |
| Viral vector vaccine    | 0.39        |
| Protein subunit vaccine | 0.32        |

| Vaccine Type            | SUCRA value |
|-------------------------|-------------|
| Placebo                 | 0.99        |
| Inactivated vaccine     | 0.63        |
| mRNA vaccine            | 0.01        |
| Viral vector vaccine    | 0.42        |
| Protein subunit vaccine | 0.45        |
